# Supplementary material for: Engineering the HK97 virus-like particle as a nanoplatform for biotechnology applications
Source: Royal Society of Chemistry journal article supplement (doi:10.1039/d3tb00318c), 2023-01-01
Supplement: d3tb00318c1.pdf [file d3tb00318c1.pdf]

## Supplementary Materials

Engineering the HK97 Virus-Like Particle as a nanoplatform for biotechnology applications.

Michael D. Woods<sup>A</sup>, Matthew Cali<sup>A</sup>, Bubacarr Ceesay<sup>A</sup>, Shandis Fancher<sup>B</sup>, Gaini Ibrasheva<sup>A</sup>, Suefian Kandeel<sup>A</sup>, Manon Nassar<sup>A</sup>, Ali Azghani<sup>B</sup>, Brent Bill<sup>B</sup>, and Dustin P. Patterson<sup>A\*</sup>

<sup>A</sup>The University of Texas at Tyler, Department of Chemistry and Biochemistry, 3900 University Dr., Tyler, TX 75799.

<sup>B</sup>The University of Texas at Tyler, Department of Biology, 3900 University Dr., Tyler, TX 75799.

\*Corresponding author: dpatterson@uttyler.edu

## DNA Sequences

HK97 GP5 (wild type)

ATGTCTGAACTCGCTCTCATTCAAAAAGCTATCGAAGAATCCCAGCAGAAAATGACCCAGCTTTTCGATGCGCAGA  
AAGCAGAAATCGAAAGCACAGGCCAGGTTTCAAACAGTTGCAGTCCGACCTGATGAAAGTACAGGAAGAGCTG  
ACCAAATCCGGCACTCGCCTCTTCGATCTGGAACAGAACTGGCATCCGGCGCTGAGAATCCTGGTGAGAAGAAA  
TCCTTCTCTGAACGGGCTGCTGAAGAGCTTATTAAGTCATGGGACGGTAAACAGGGCACCTTTGGCGCTAAAACG  
TTTAACAAGTCACTAGGCAGTGACGCTGATTCGGCTGGCTCACTGATCCAGCCTATGCAGATCCCAGGCATCATCA  
TGCCAGGCCTGCGCCGCTTACCATTCTGATCTGCTGGCTCAGGGCCGCACTTCCAGTAACGCTCTGGAATATGT  
GCGTGAAGAGGTGTTTACCAATAACGCCGACGTGGTGGCAGAGAAAGCACTGAAGCCAGAATCGGATATCACCTT  
CAGCAAACAAACCGCGAACGTGAAGACCATCGCGCACTGGGTGCAGGCATCACGTCAGGTGATGGATGATGCGC  
CAATGCTTCAGTCTACATTAACAACCGCCTCATGTACGGCCTGGCACTGAAGGAAGAGGGCCAGCTGCTGAACG  
GCGACGGTACCGGGGATAACCTGGAAGGGCTGAACAAAGTGGCAACCGCCTATGACACCTCGCTGAATGCCACC  
GGCGACACCCGCGCTGACATTATCGCTCACGCTATTTATCAGGTGACCGAGTCTGAGTTCAGCGCTTCCGGTATCG  
TCCTGAACCCGCGCACTGGCACAACATCGCGTTGCTGAAAGACAATGAAGGCCGCTATATCTTCGGTGGTCCTCA  
GGCAATTCACCAAGTAACATCATGTGGGGCTTGCCAGTGGTTCCGACTAAGGCGCAGGCCGCCGGCACCTTTACCGT  
AGGCGGTTTCGATATGGCCTCACAGGTCTGGGATCGCATGGATGCCACCGTGAAGTTAGCCGTGAAGACCGCG  
ATAACTTCGTGAAAAACATGCTGACCATCCTGTGCGAAGAGCGTCTGGCGCTGGCGCATTATCGCCCGACAGCAA  
TCATCAAGGGCACCTTCTCTTCTGGCTCATGA

\*For the A302C variant the GCA codon has a change to the codon TGT

\*S305C has a change at the highlighted position to the codon TGT

HK97 GP4

ATGGCACCTGAAATCGTAAAAACGCTGTCCTTCGACGAGACAGAAATCAAATTCACCGGTGACGGGAAGCAGGG  
GATTTTCGAAGGATATGCCTCTGTTTTTAATAACACCGATTCCGATGGCGACATCATTCTGCCCGGGCGTTTTAAAA  
ACGCGCTGGCGAACCAGACCCGAAAAGTGGCGATGTTTTCAACCACAAGACGTGGGAGCTGCCGTTGGTAAAT  
GGGACAGTCTGGCCGAAGACGAAAAAGGGCTCTACGTTTCGCGGTCAACTTACCCAGGACACAGCGGCGCCGCC

GACCTGAAAGCAGCAATGCAGCACGGCACGGTTGAGGGTATGTCGGTTGGCTTTCCGTTGCGAAAGACGATTAC  
ACCATCATTCCCACAGGCCGGATTTTTAAGAATATCCAGGCTCTGCGCGAAATCAGCGTCTGCACTTTCCCGCCAA  
CGAACAGGCTGGCATCGCAGCCATGAAAAGTGTGATGGCATTGAAACGATCCGTGATGTGGAGAAGTGGCTGA  
GGGATTCAGTCGGCCTCACAAATCACAGGCAGTTGGGCTAATAGCCCGTTTAAGTCAGCGATTCCGAGCGAGT  
CCGAGGGCGACGGAAACGAAGCACAATAAACGCTCTGCTTCAGAGCATCAAATCTTCCCTTCTAACTTAGGTAA  
ATAA

#### GFP-targeting peptide fusion

ATGGGCGGAGGAGGCAAGGGGGTGAAGGAAGTAATGAAGATCAGTCTGGAGATGGACTGCACTGTTAACGGCG  
ACAAATTTAAGATCATTGGGGATGGAACAGGAGAACCTTACGAAGGAACACAGACTTTACATCTTACAGAGAAGG  
AAGGCAAGCCTCTGACGTTTTCTTCGATGTATTGACACCAGCATTTTCAGTATGGAAACCGTACATTCACCAAATAC  
CCAGGCAATATAACCAGACTTTTTCAAGCAGACCGTTTCTGGTGGCGGGTATACCTGGGAGCGAAAAATGACTTAT  
GAAGACGGGGGCATAAGTAACGTCCGAAGCGACATCAGTGTGAAAGGTGACTCTTCTACTATAAGATTCCTTC  
ACTGGCGAGTTTTCTCCTCATGGTCCAGTGATGCAGAGGAAGACAGTAAAATGGGAGCCATCCACTGAAGTAATG  
TATGTTGACGACAAGAGTGACGGTGTGCTGAAGGGAGATGTCAACATGGCTCTGTTGCTTAAAGATGGCCGCCAT  
TTGAGAGTTGACTTTAACACTTCTTACATACCCAAGAAGAAGTTCGAGAATATGCCTGACTACATTTTATAGACCA  
CCGCATTGAGATTCTGGGCAACCCAGAAGACAAGCCGGTCAAGCTGTACGAGTGTGCTGTAGCTCGCTATTCTCTG  
CTGCCTGAGAAGAACAAGGGATCCGGCGGTGATGGCATTGAAACGATCCGTGATGTGGAGAAGTGGCTGAGGGA  
TTCAGTCGGCCTCACCAAATCACAGGCAGTTGGGCTAATAGCCCGTTTAAGTCAGCGATTCCGAGCGAGTCCGA  
GGGCGACGGAAACGAAGCACAATAAACGCTCTGCTTCAGAGCATCAAATCTTCCCTTCTAACTTAGGTAAATAA

#### HK97 GP5-LPETG

ATGTCTGAACTCGCTCTCATTCAAAAAGCTATCGAAGAATCCCAGCAGAAAATGACCCAGCTTTTCGATGCGCAGA  
AAGCAGAAATCGAAAGCACAGGCCAGGTTTTCAAACAGTTGCAGTCCGACCTGATGAAAGTACAGGAAGAGCTG  
ACCAAATCCGGCACTCGCCTCTTCGATCTGGAACAGAACTGGCATCCGGCGCTGAGAATCCTGGTGAGAAGAAA  
TCCTTCTCTGAACGGGCTGCTGAAGAGCTTATTAAGTCATGGGACGGTAAACAGGGCACCTTTGGCGCTAAAACG  
TTTAAACAAGTCACTAGGCAGTGACGCTGATTCGGCTGGCTCACTGATCCAGCCTATGCAGATCCCAGGCATCATCA  
TGCCAGGCCTGCGCCGTCTTACCATTCTGATCTGCTGGCTCAGGGCCGCACTTCCAGTAACGCTCTGGAATATGT  
GCGTGAAGAGGTGTTTACCAATAACGCCGACGTGGTGGCAGAGAAAGCACTGAAGCCAGAATCGGATATCACCTT  
CAGCAAACAAACCGCGAACGTGAAGACCATCGCGCACTGGGTGCAGGCATCACGTCAGGTGATGGATGATGCGC  
CAATGCTTCAGTCTACATTAACAACCGCCTCATGTACGGCCTGGCACTGAAGGAAGAGGGCCAGCTGCTGAACG  
GCGACGGTACCGGGGATAACCTGGAAGGGCTGAACAAAGTGGCAACCGCCTATGACACCTCGCTGAATGCCACC  
GGCGACACCCGCGCTGACATTATCGCTCACGCTATTTATCAGGTGACCGAGTCTGAGTTCAGCGCTTCCGGTATCG  
TCCTGAACCCGCGGACTGGCACAACATCGCGTTGCTGAAAGACAATGAAGGCCGCTATATCTTCGGTGGTCTCTCA  
GGCATTACCAGTAACATCATGTGGGGCTTGCCAGTGGTTCCGACTAAGGCGCAGGCCGCCGGCACCTTTACCGT  
AGGCGTTTTGATATGGCCTCACAGGTCTGGGATCGCATGGATGCCACCGTGAAGTTAGCCGTGAAGACCGCG  
ATAACTTCGTGAAAAACATGCTGACCATCCTGTGCGAAGAGCGTCTGGCGCTGGCGCATTATCGCCCGACAGCAA  
TCATCAAGGGCACCTTCTCTTCTGGCTCAAGATCTGCAGGCGCGGAGGTGCCGAGGAGGTACCCTGCCGAA  
CCGGCGGTAGCTAAC

HK97 GP5-RGDS S305C

ATGTCTGAACTCGCTCTCATTCAAAAAGCTATCGAAGAATCCCAGCAGAAAATGACCCAGCTTTTCGATGCGCAGA  
AAGCAGAAATCGAAAGCACAGGCCAGTTTCCAAACAGTTGCAGTCCGACCTGATGAAAGTACAGGAAGAGCTG  
ACCAAATCCGGCACTCGCCTCTTCGATCTGGAACAGAACTGGCATCCGGCGCTGAGAATCCTGGTGAGAAGAAA  
TCCTTCTCTGAACGGGCTGCTGAAGAGCTTATTAAGTCATGGGACGGTAAACAGGGCACCTTTGGCGCTAAAACG  
TTTAAACAAGTCACTAGGCAGTGACGCTGATTCGGCTGGCTCACTGATCCAGCCTATGCAGATCCCAGGCATCATCA  
TGCCAGGCCTGCGCCGCTTACCATTCTGTGATCTGCTGGCTCAGGGCCGCACTTCCAGTAACGCTCTGGAATATGT  
GCGTGAAGAGGTGTTTACCAATAACGCCGACGTGGTGGCAGAGAAAAGCACTGAAGCCAGAATCGGATATCACCTT  
CAGCAAACAAACCGGAACGTGAAGACCATCGCGCACTGGGTGCAGGCATCACGTCAGGTGATGGATGATGCGC  
CAATGCTTCAGTCCTACATTAACAACCGCCTCATGTACGGCCTGGCACTGAAGGAAGAGGGCCAGCTGCTGAACG  
GCGACGGTACCGGGGATAACCTGGAAGGGCTGAACAAAGTGGCAACCGCCTATGACACCTCGCTGAATGCCACC  
GGCGACCCCGCTGACATTATCGCTCACGCTATTTATCAGGTGACCGAGTCTGAGTTCAGCGCTTCCGGTATCG  
TCCTGAACCCGCGCACTGGCACAACATCGCGTTGCTGAAAGACAATGAAGGCCGCTATATCTTCGGTGGTCCTCA  
GGCATTACCTGTAACATCATGTGGGGCTTGCCAGTGGTTCGACTAAGGCGCAGGCCGCCGGCACCTTTACCGTA  
GGCGTTTTCGATATGGCCTCACAGGTCTGGGATCGCATGGATGCCACCGTGAAGTTAGCCGTGAAGACCGCGAT  
AACTTCGTGAAAAACATGCTGACCATCCTGTGCGAAGAGCGTCTGGCGCTGGCGCATTATCGCCGACAGCAATC  
ATCAAGGGCACCTTCTTCTGGCTCAAGATCTGCAGGGCGGCGAGGTGCCGGAGGAGGTACCCGTGGCGATAG  
CTAA

**Protein Sequences**

GP5

MSELALIQKAIIESQQKMTQLFDAQKAEIESTGQVSKQLQSDLMKVQEELTKSGTRFLDLEQKLASGAENPGEKKSFSE  
RAAEELIKSWDGKQGTFGAKTFNKSLGSDADSAGSLIQPMQIPGIIMPGLRRLTIRDLLAQGRTSSNALEYVREEVFTNN  
ADVVAEKALKPESDITFSKQTANVKTIAHWVQASRQVMDDAPMLQSYINNRLMYGLALKEEGQLLNGDGTGDNLEGL  
NKVATAYDTSLNATGDTRADIIAHAIYQVTESEFSASGIVLNPRDWHNIALLDNEGRYIFGGPQAFTSNIMWGLPVVP  
TKAQAAGTFTVGGFDMASQVWDRMDATVEVSREDRDNFVKNMLTILCEERLALAHYRPTAIKGTFFSSGS

GP4

MAPEIVKTLSEFDETEIKFTGDGKQGFEGYASVFNNTDSDGDIILPGAFKNALANQTRKVAMFFNHKTWELPVGKWDSL  
AEDEKGLYVRGQLTPGHSGAADLKAAMQHGTVEGMSVGFSAKDDYTIIPTGRIFKNIQALREISVCTFPANEQAGIAA  
MKSVDGIETIRDVENWLRDSVGLTKSQAVGLIARFKSAIRSESEGDGNEAQINALLQSIKSFPSNLGK

GFP-targeting peptide fusion

MGGGGKGVKEVMKISLEMDCTVNGDKFKIIGDGTGEPYEGTQTLHLTEKEGKPLTFSFDVLTAPAFQYGNRTFTKYPGNI  
PDFFKQTVSGGGYTWERKMTYEDGGISNVRSDISVKGDSFYKIHFTGEFPPHGPVMQRKTVKWEPSTEVMYVDDKS  
DGVLKGDVNMALLLKDGRHLRVDNFNTSYIPKKVENMPDYHFIDHRIEILGNPEDKPKVLYECAVARYSLLPEKNKGS  
GDGIETIRDVENWLRDSVGLTKSQAVGLIARFKSAIRSESEGDGNEAQINALLQSIKSFPSNLGK

GP5-LPETG

MSELALIQKAIEESQQKMTQLFDAQKAEIESTGQVSKQLQSDLMKVQEELTKSGTRLFDLEQKLASGAENPGEKKSFE  
RAAEELIKSWDGKQGTFGAKTFNKSLGSDADSAGSLIQPMQIPGIIMPGLRRLTIRDLLAQGRTSSNALEYVREEVFTNN  
ADVVAEKALKPESDITFSKQTANVKTIAHWVQASRQVMDDAPMLQSYINNRLMYGLALKEEGQLLNGDGTGDNLEGL  
NKVATAYDTSLNATGDTRADIIAHAIYQVTESEFSASGIVLNPRDWHNIALKDNEGRYIFGGPQAFTSNIMWGLPVVP  
TKAQAAGTFTVGGFDMASQVWDRMDATVEVSREDRDNFVKNMLTILCEERLALAHYRPTAIKGTFFSSGSRSAGGGG  
AGGGTLPETGGS

GP5-RGD S305C

MSELALIQKAIEESQQKMTQLFDAQKAEIESTGQVSKQLQSDLMKVQEELTKSGTRLFDLEQKLASGAENPGEKKSFE  
RAAEELIKSWDGKQGTFGAKTFNKSLGSDADSAGSLIQPMQIPGIIMPGLRRLTIRDLLAQGRTSSNALEYVREEVFTNN  
ADVVAEKALKPESDITFSKQTANVKTIAHWVQASRQVMDDAPMLQSYINNRLMYGLALKEEGQLLNGDGTGDNLEGL  
NKVATAYDTSLNATGDTRADIIAHAIYQVTESEFSASGIVLNPRDWHNIALKDNEGRYIFGGPQAFTCNIMWGLPVVP  
TKAQAAGTFTVGGFDMASQVWDRMDATVEVSREDRDNFVKNMLTILCEERLALAHYRPTAIKGTFFSSGSRSAGGGG  
AGGGTRGDS

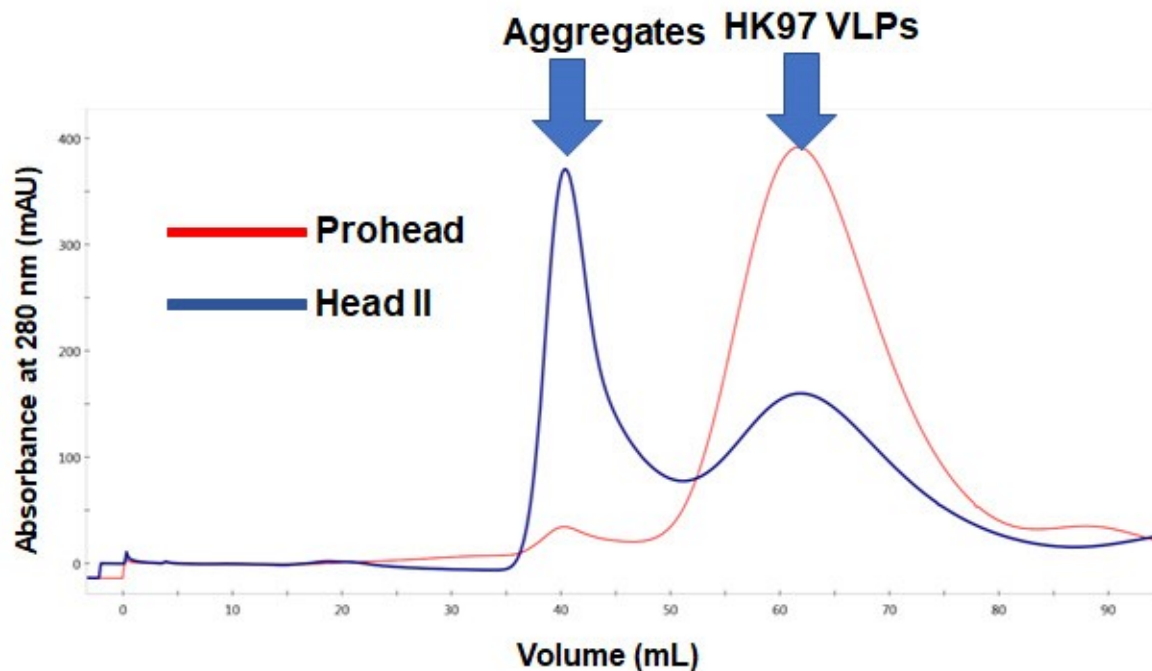

**Figure S1. Comparison of HK97 Prohead size exclusion chromatography purification to mature Head II size exclusion chromatography.** The size exclusion chromatography HK97 Head II elution profile shows an increased intensity for the peak corresponding to aggregates near the void volume relative to the elution profile for a Prohead HK97 VLP sample.

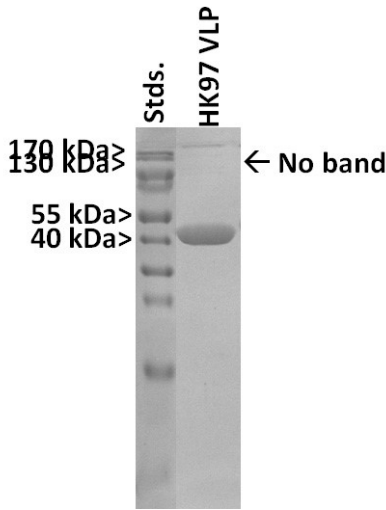

**Figure S2. SDS-PAGE analysis of the HK97 VLP derived from wild type GP5 prepared using TCA precipitation.** Preparation by TCA precipitation removed a band associated with polymerization of GP5 subunits that is normally observed by common SDS-PAGE preparation methods utilized in our lab.

|                                | Size (d.nm):         | % Intensity: | St Dev (d.nm): |
|--------------------------------|----------------------|--------------|----------------|
| <b>Z-Average (d.nm):</b> 52.33 | <b>Peak 1:</b> 54.47 | 100.0        | 12.10          |
| <b>Pdl:</b> 0.009              | <b>Peak 2:</b> 0.000 | 0.0          | 0.000          |
| <b>Intercept:</b> 0.960        | <b>Peak 3:</b> 0.000 | 0.0          | 0.000          |
| <b>Result quality :</b> Good   |                      |              |                |

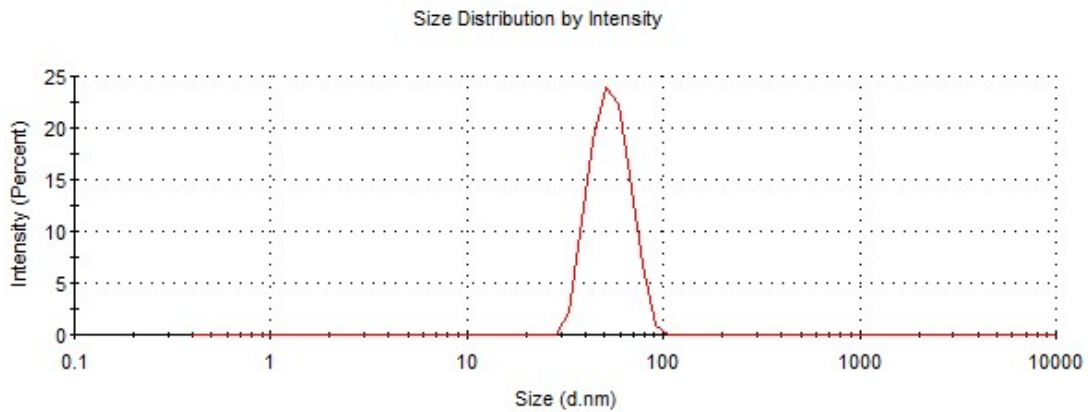

**Figure S3. Representative dynamic light scattering intensity spectra and distribution values for the Prohead I HK97 VLP.** Values indicate homogeneous nanoparticles and sizes consistent with the expected HK97 Prohead VLPs.

|                                | Size (d.nm):         | % Intensity: | St Dev (d.nm): |
|--------------------------------|----------------------|--------------|----------------|
| <b>Z-Average (d.nm):</b> 52.85 | <b>Peak 1:</b> 55.02 | 100.0        | 12.17          |
| <b>Pdl:</b> 0.010              | <b>Peak 2:</b> 0.000 | 0.0          | 0.000          |
| <b>Intercept:</b> 0.971        | <b>Peak 3:</b> 0.000 | 0.0          | 0.000          |
| <b>Result quality :</b> Good   |                      |              |                |

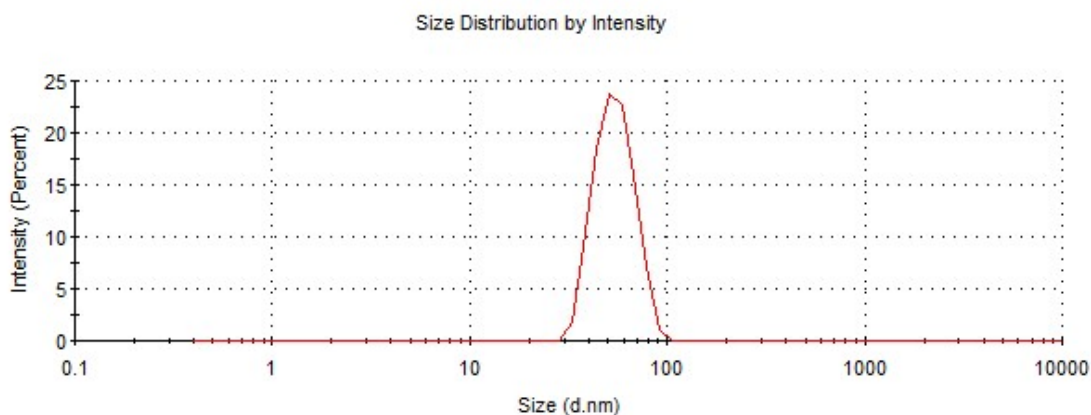

**Figure S4. Representative dynamic light scattering intensity spectra and distribution values for the Prohead II HK97 VLP.** Values indicate homogeneous nanoparticles and sizes consistent with the expected HK97 Prohead VLPs.

|                                | Size (d.nm):         | % Intensity: | St Dev (d.nm): |
|--------------------------------|----------------------|--------------|----------------|
| <b>Z-Average (d.nm):</b> 67.00 | <b>Peak 1:</b> 74.19 | 100.0        | 25.94          |
| <b>Pdl:</b> 0.130              | <b>Peak 2:</b> 0.000 | 0.0          | 0.000          |
| <b>Intercept:</b> 0.953        | <b>Peak 3:</b> 0.000 | 0.0          | 0.000          |
| <b>Result quality :</b> Good   |                      |              |                |

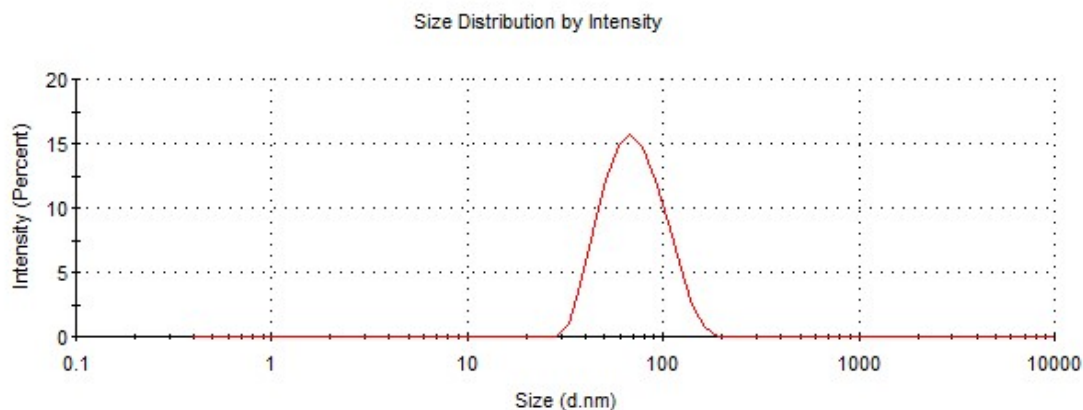

**Figure S5. Representative dynamic light scattering intensity spectra and distribution values for the Head II HK97 VLP.** Values indicate homogeneous nanoparticles and sizes consistent with the expected HK97 Head VLPs.

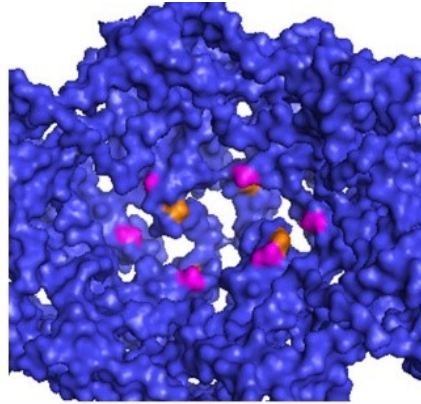

|               |                                               |
|---------------|-----------------------------------------------|
| Wild Type GP5 | 1-MSEL...PQA <u>F</u> T <u>S</u> N...SSGS-385 |
| GP5 A302C     | 1-MSEL...PQ <u>C</u> FTSN...SSGS-385          |
| GP5 S305C     | 1-MSEL...PQAFT <u>C</u> N...SSGS-385          |

**Figure S6. Close up view of the Prohead HK97 VLP internal surface and sequence comparison of wild type to GP5 mutant variants.** Close up view of the interior surface of a GP5 hexamer comprising the Prohead HK97 VLP. The A302 position is colored orange and the S305 position is colored magenta. An amino acid sequence overlay of the different modifications made from the wild type GP5 is shown below the structural model.

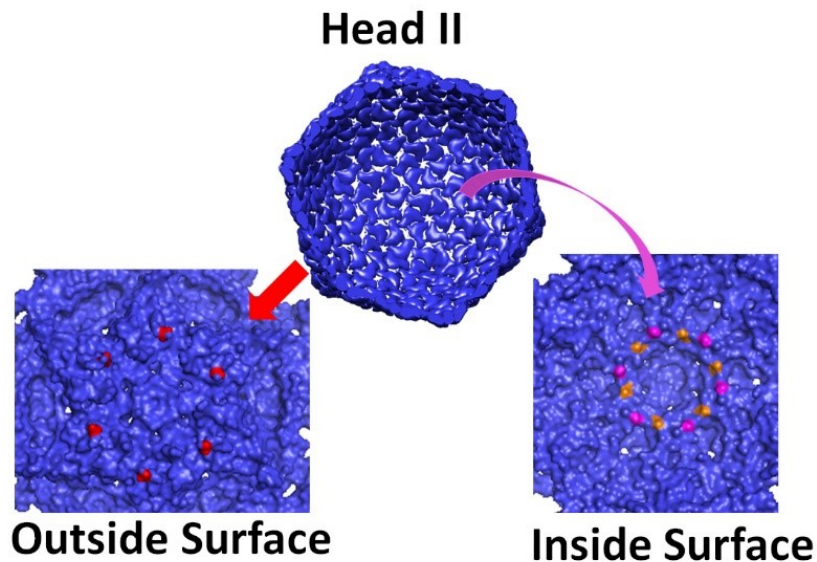

**Figure S7. Molecular model of the Head II HK97 structure showing the internal and external surfaces with highlighted amino acid residues.** The structural model of the Head II HK97 VLP shows that the A302 (orange) and S305 (magenta) residues are still exposed on the interior surface upon transformation from the Prohead form. The outer surface also has the C-terminal residue (red) visible in the model, indicating that transformation to the Head II does not drastically alter the positioning of the C-terminus.

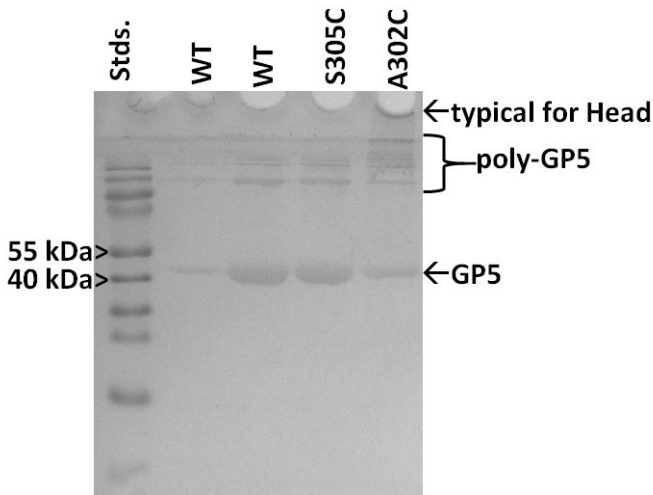

**Figure S8. SDS-PAGE comparison of HK97 GP5 variants.** The GP5 A302C variant (A302C) showed noticeably more polymers of GP5 (poly-GP5) than wild type (WT) and the GP5 S305C variant (S305C), especially increased staining in the well area, similar to what is observed for Head II transformed HK97 VLPs.

|                                | Size (d.nm):         | % Intensity: | St Dev (d.nm): |
|--------------------------------|----------------------|--------------|----------------|
| <b>Z-Average (d.nm):</b> 64.11 | <b>Peak 1:</b> 69.28 | 100.0        | 19.84          |
| <b>Pdl:</b> 0.069              | <b>Peak 2:</b> 0.000 | 0.0          | 0.000          |
| <b>Intercept:</b> 0.967        | <b>Peak 3:</b> 0.000 | 0.0          | 0.000          |
| <b>Result quality : Good</b>   |                      |              |                |

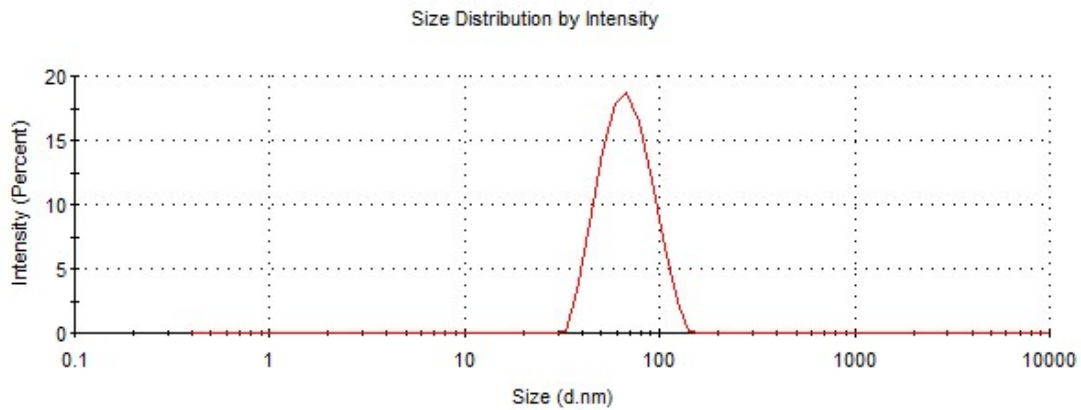

**Figure S9. Representative DLS data for the HK97 A302C VLP (prohead I) after purification.** The diameter was found to be higher than expected for the Prohead I form (56 nm), but more similar in diameter to the Head morphology (66 nm).



|                                | Size (d.nm):         | % Intensity: | St Dev (d.nm): |
|--------------------------------|----------------------|--------------|----------------|
| <b>Z-Average (d.nm):</b> 52.69 | <b>Peak 1:</b> 55.20 | 100.0        | 12.68          |
| <b>Pdl:</b> 0.026              | <b>Peak 2:</b> 0.000 | 0.0          | 0.000          |
| <b>Intercept:</b> 0.970        | <b>Peak 3:</b> 0.000 | 0.0          | 0.000          |
| <b>Result quality : Good</b>   |                      |              |                |

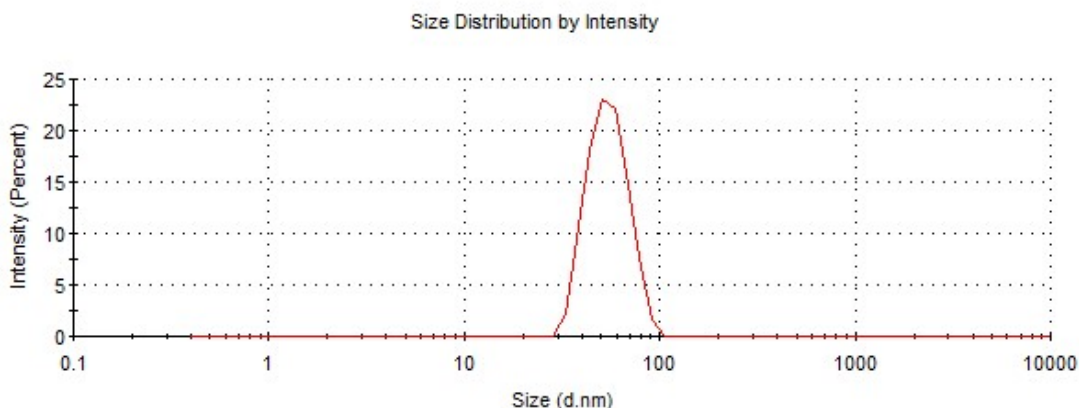

**Figure S10. Representative dynamic light scattering intensity spectra and distribution values for the Prohead I HK97 S305C VLP prior to fluorescent labeling.** Values indicate homogeneous nanoparticles and sizes consistent with the expected HK97 Prohead VLPs.

|                                | Size (d.nm):         | % Intensity: | St Dev (d.nm): |
|--------------------------------|----------------------|--------------|----------------|
| <b>Z-Average (d.nm):</b> 51.71 | <b>Peak 1:</b> 54.84 | 100.0        | 13.98          |
| <b>Pdl:</b> 0.041              | <b>Peak 2:</b> 0.000 | 0.0          | 0.000          |
| <b>Intercept:</b> 0.959        | <b>Peak 3:</b> 0.000 | 0.0          | 0.000          |
| <b>Result quality : Good</b>   |                      |              |                |

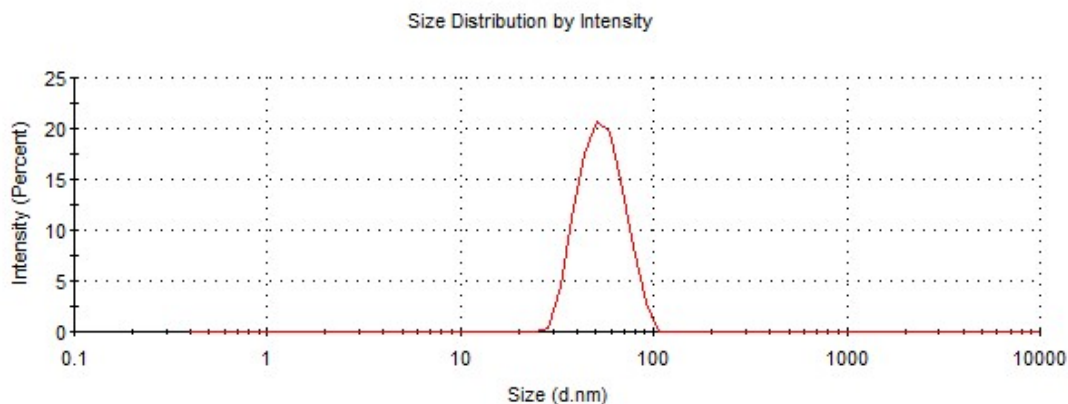

**Figure S11. Representative dynamic light scattering intensity spectra and distribution values for the Prohead I HK97 S305C VLP after labeling with 5-IAF.** Values indicate homogeneous nanoparticles with sizes unchanged after labeling and purification.

|                                | Size (d.nm):         | % Intensity: | St Dev (d.nm): |
|--------------------------------|----------------------|--------------|----------------|
| <b>Z-Average (d.nm):</b> 54.49 | <b>Peak 1:</b> 55.70 | 100.0        | 8.312          |
| <b>Pd:</b> 0.019               | <b>Peak 2:</b> 0.000 | 0.0          | 0.000          |
| <b>Intercept:</b> 0.967        | <b>Peak 3:</b> 0.000 | 0.0          | 0.000          |

**Result quality : Good**

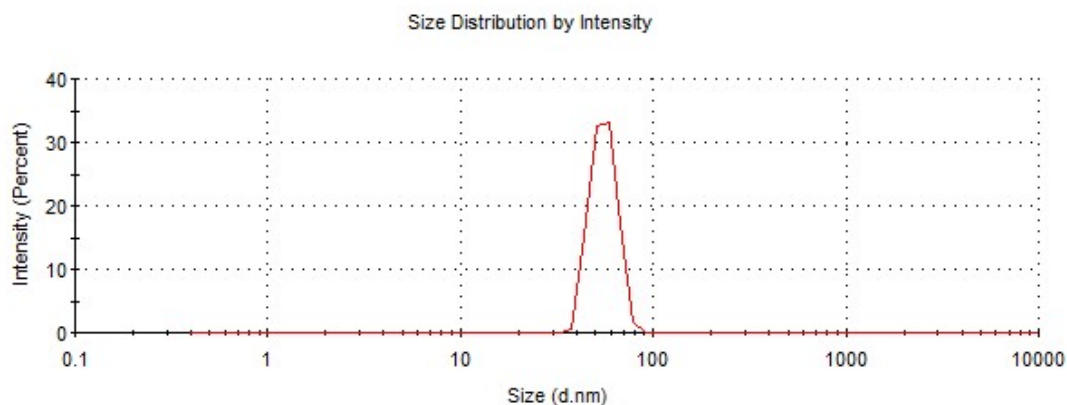

**Figure S12. Representative dynamic light scattering intensity spectra and distribution values for the Prohead I HK97 VLP/GFP-TP through co-expression strategy.** Values indicate homogeneous nanoparticles and sizes consistent with the expected HK97 Prohead VLPs, essential unchanged upon encapsulation of GFP-TP.

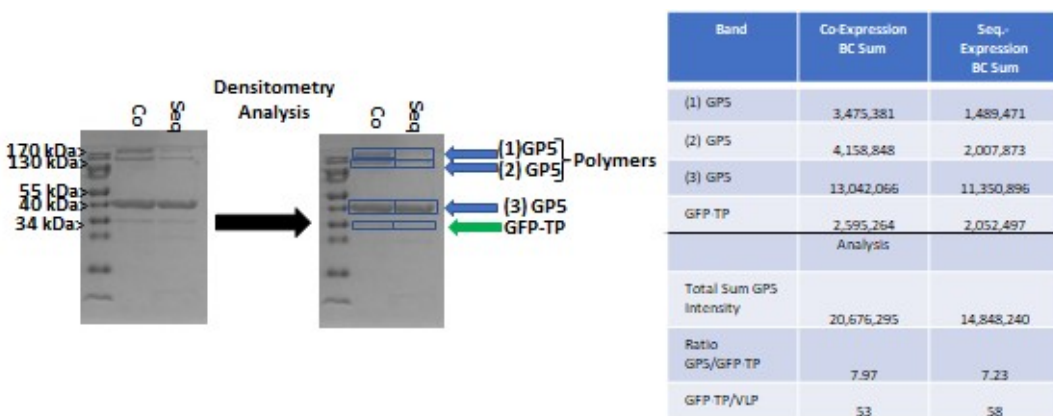

**Figure S13. Representative SDS-PAGE and densitometry analysis for determination of GFP-TP packaged per HK97 VLP by co-expression and sequential expression methods.**

|                                | Size (d.nm):         | % Intensity: | St Dev (d.nm): |
|--------------------------------|----------------------|--------------|----------------|
| <b>Z-Average (d.nm):</b> 56.96 | <b>Peak 1:</b> 58.62 | 100.0        | 10.03          |
| <b>Pdl:</b> 0.027              | <b>Peak 2:</b> 0.000 | 0.0          | 0.000          |
| <b>Intercept:</b> 0.961        | <b>Peak 3:</b> 0.000 | 0.0          | 0.000          |

**Result quality : Good**

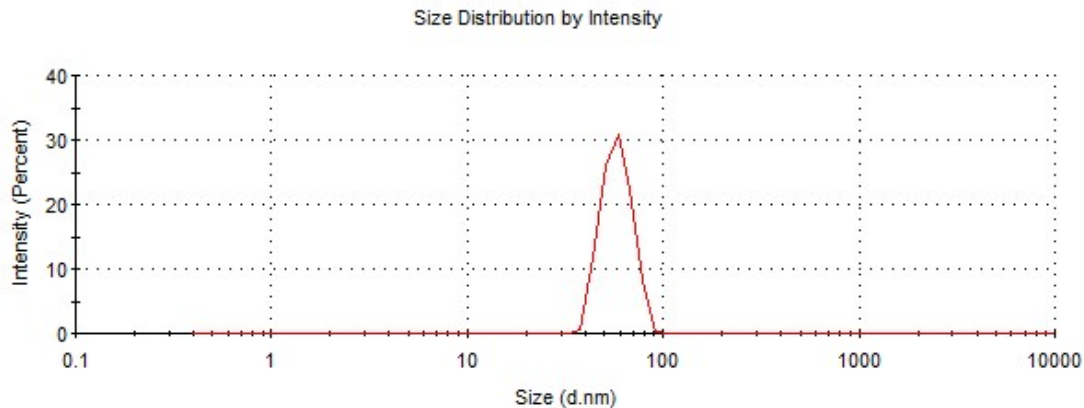

**Figure S14. Representative dynamic light scattering intensity spectra and distribution values for the Prohead I HK97 VLP/GFP-TP through sequential 2-plasmid strategy.** Values indicate homogeneous nanoparticles and sizes consistent with the expected HK97 Prohead VLPs, essential unchanged upon encapsulation of GFP-TP.

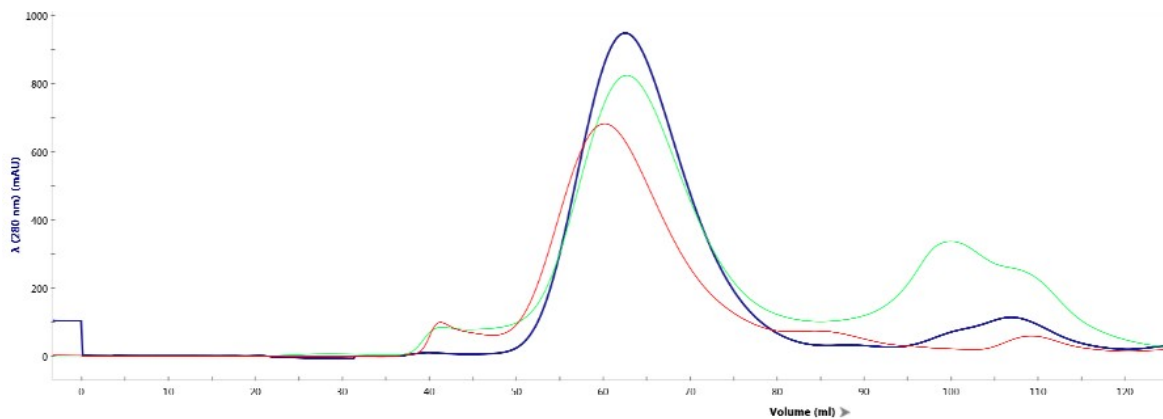

**Figure S15. Size exclusion chromatography traces comparing the HK97 VLP/GFP-TP constructs to Prohead I HK97 VLPs.** SEC chromatograms for the purification of HK97 VLP/GFP-TP produced by co-expression (blue trace) or sequential expression (green trace) of the GFP-TP and CP show indistinguishable elution profiles for the HK97 VLP in comparison with Prohead I HK97 VLP sample (red trace) aside from minor shifts due to times the runs were performed.

|                                | Size (d.nm):         | % Intensity: | St Dev (d.nm): |
|--------------------------------|----------------------|--------------|----------------|
| <b>Z-Average (d.nm):</b> 54.24 | <b>Peak 1:</b> 57.61 | 100.0        | 14.60          |
| <b>Pdl:</b> 0.049              | <b>Peak 2:</b> 0.000 | 0.0          | 0.000          |
| <b>Intercept:</b> 0.955        | <b>Peak 3:</b> 0.000 | 0.0          | 0.000          |

**Result quality :** Good

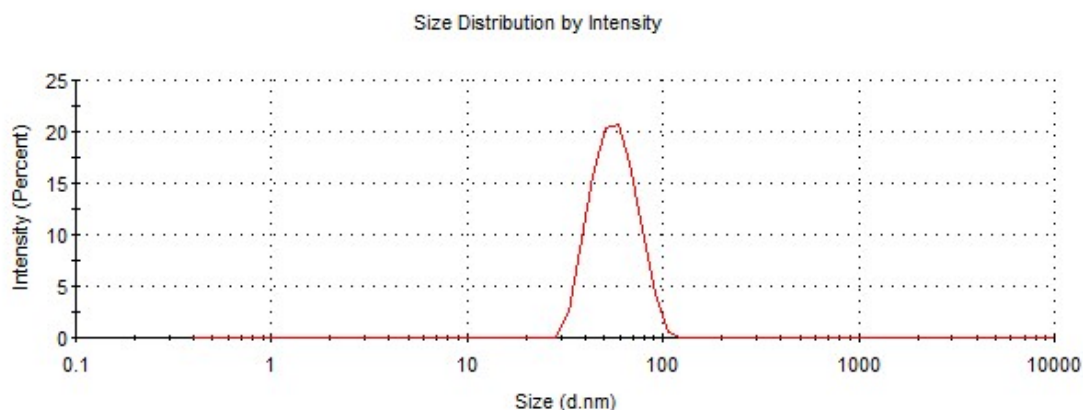

**Figure S16. Representative dynamic light scattering intensity spectra and distribution values for the Prohead I LPETG-HK97 VLP.** Values indicate homogeneous nanoparticles and sizes consistent with the expected HK97 Prohead VLPs, indicating that the addition of a short flexible peptide sequence does not add significant diameter to the VLP, as expected.

|                                | Size (d.nm):         | % Intensity: | St Dev (d.nm): |
|--------------------------------|----------------------|--------------|----------------|
| <b>Z-Average (d.nm):</b> 98.27 | <b>Peak 1:</b> 155.7 | 90.7         | 73.96          |
| <b>Pdl:</b> 0.328              | <b>Peak 2:</b> 20.21 | 9.3          | 7.562          |
| <b>Intercept:</b> 0.965        | <b>Peak 3:</b> 0.000 | 0.0          | 0.000          |

**Result quality :** Refer to quality report

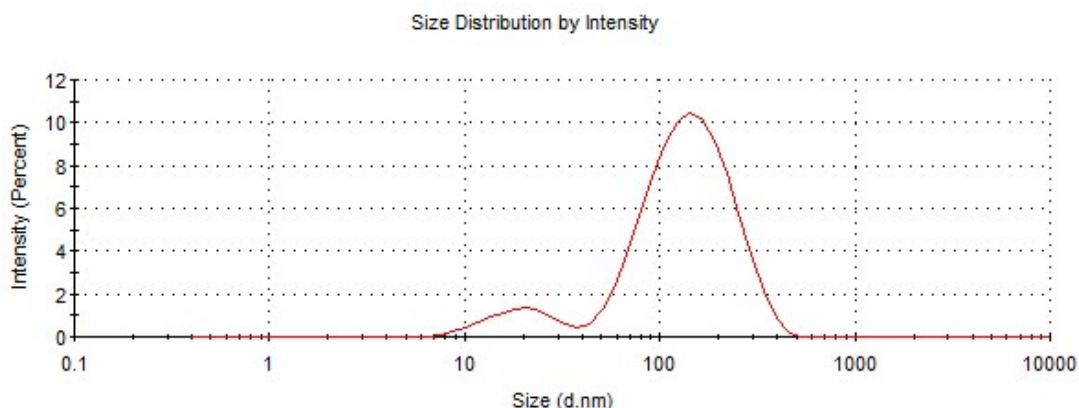

**Figure S17. DLS analysis of sortase ligation reaction of polyG-GFP with LPETG-HK97 VLPs.** The results show a heterogeneous mixture distributed between small particles (sortase and polyG-GFP) and larger particles, consistent with attachment of polyG-GFP to the exterior of the HK97 VLP.

|                                | Size (d.nm):         | % Intensity: | St Dev (d.nm): |
|--------------------------------|----------------------|--------------|----------------|
| <b>Z-Average (d.nm):</b> 55.42 | <b>Peak 1:</b> 58.12 | 100.0        | 13.56          |
| <b>Pdl:</b> 0.025              | <b>Peak 2:</b> 0.000 | 0.0          | 0.000          |
| <b>Intercept:</b> 0.970        | <b>Peak 3:</b> 0.000 | 0.0          | 0.000          |

**Result quality :** Good

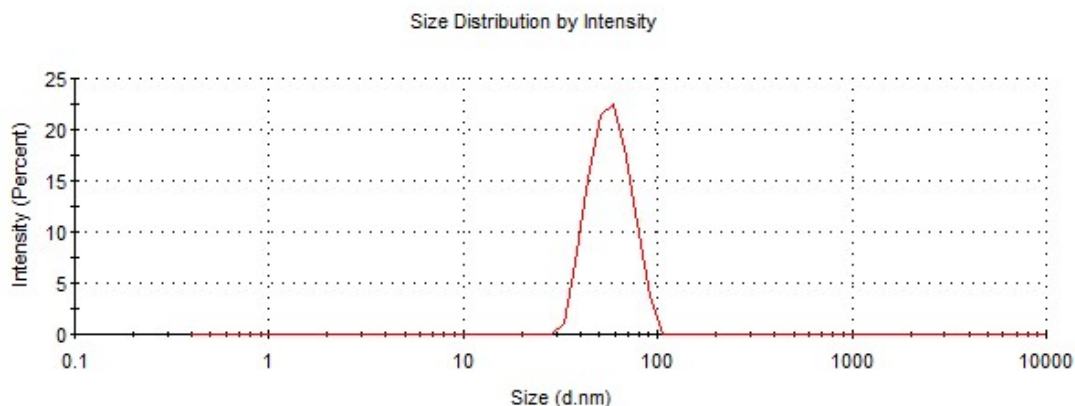

**Figure S18. Representative dynamic light scattering intensity spectra and distribution values for the Prohead I RGDS-HK97 S305C VLP unlabeled.** Values indicate homogeneous nanoparticles and sizes consistent with the expected HK97 Prohead VLPs, indicating that the addition of a short RGDS peptide sequence does not add significant diameter to the VLP, as expected.

|                                | Size (d.nm):         | % Intensity: | St Dev (d.nm): |
|--------------------------------|----------------------|--------------|----------------|
| <b>Z-Average (d.nm):</b> 55.59 | <b>Peak 1:</b> 60.29 | 100.0        | 17.75          |
| <b>Pdl:</b> 0.069              | <b>Peak 2:</b> 0.000 | 0.0          | 0.000          |
| <b>Intercept:</b> 0.957        | <b>Peak 3:</b> 0.000 | 0.0          | 0.000          |

**Result quality :** Good

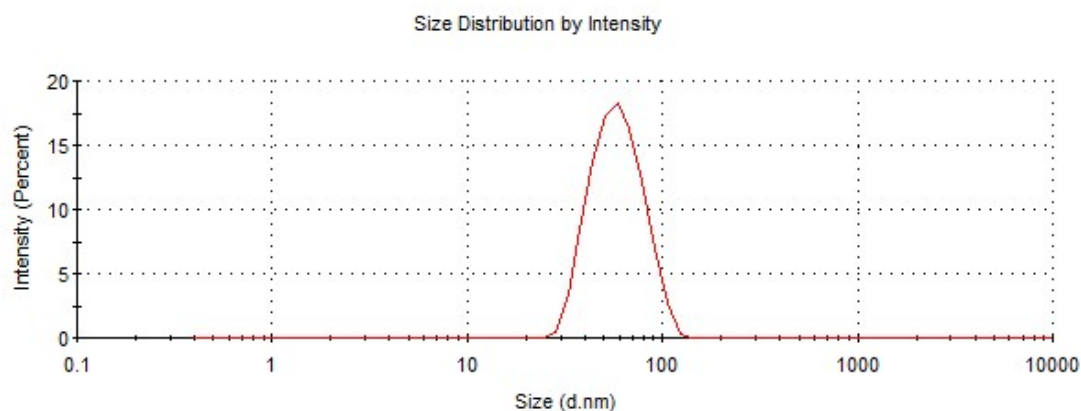

**Figure S19. Representative dynamic light scattering intensity spectra and distribution values for the Prohead I RGDS-HK97 S305C VLP after labeling with 5-IAF.** Values indicate homogeneous nanoparticles with sizes unchanged after labeling and purification.

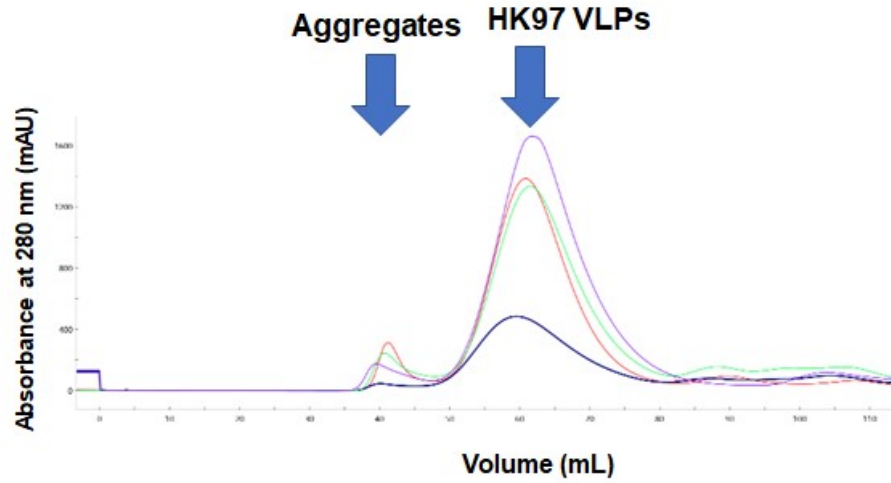

**Figure S20. Size exclusion chromatography traces comparing several variants of Prohead I HK97 VLPs examined in this study.** SEC chromatograms comparing the elution profiles of Prohead II (purple trace), HK97 S305C VLP (green), LPETG HK97 VLP (red trace), and RGDS-HK97 VLP (blue trace) show very little shift in the elution of the VLP particles, suggesting no change upon modification of the HK97 VLP.
